# Supplementary material
Source: PubMed Central journal article supplement (PMC3258108)

-60 minutes  
cytoD

0 minutes  
nocodazole

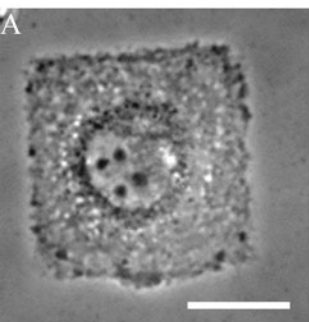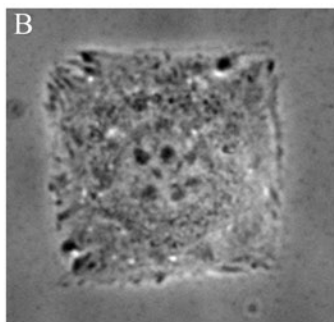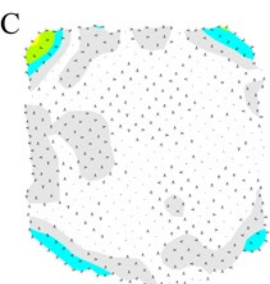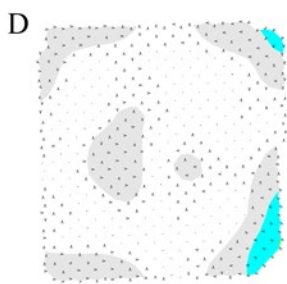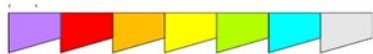

kPa  
282  
50.1  
20.4  
12.6  
7.74  
4.77  
2.56  
.212

E

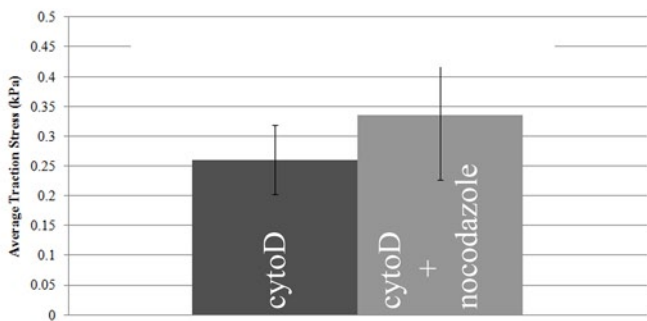

Supplement: supp_jcs.090563_JCS090563FigS2.pdf [file supp_jcs.090563_JCS090563FigS2.pdf]
